# Supplementary material for: Absence of rapid T cell control corresponds with delayed viral clearance in hospitalised COVID-19 patients
Source: Research Square preprint supplement (doi:10.21203/rs.3.rs-783703/v1), 2021-08-06
Supplement: Supplementary file 1 [file 22cced1d4882e8e36e107884.xlsx]

## Sheet: Ext. Table 1
Extended data Table 1. List of immune parameters measured in this study.
Cytokines and chemokines (Luminex)	Leukocyte subsets (Flowcytometry)	Antibodies	SARS-CoV-2 specific T cells
6Ckine/CCL21	Lymphocytes	Anti-N IgG	SARS-CoV-2 CD4+ (%)
BCA-1/CXCL13	B cells	Anti-N (front)	SARS-CoV-2 CD8+ (%)
CTACK/CCL27	Pre-germinal center B cells	Anti-N (back)
ENA-78/CXCL5	Post-germinal center B cells	Anti-S1/2 IgG
Eotaxin/CCL11	Memory B cells, switched	Anti-RBD IgM
Eotaxin-2/CCL24	Memory B cells, unswitched	Anti-S1 IgA
Eotaxin-3/CCL26	Plasmablasts	Anti-229E
Fractalkine/CX3CL1	T cells	SARS-CoV-2 neutralization titer
GCP-2/CXCL6	T cells CD4+
GM-CSF	T cells CD4+ naïve
Gro-alpha/CXCL1	T cells CD4+ central/ transitional memory
Gro-beta/CXCL2	T cells CD4+ effector memory
I-309/CCL1	T cells CD4+ effector, terminally differentiated
IFN-gamma	T cells CD8+
IL-2	T cells CD8+ naïve
IL-4	T cells CD8+ central/ transitional memory
IL-6	T cells CD8+ effector memory
IL-8/CXCL8	T cells CD8+ effector, terminally differentiated, CD27+
IL-10	T cells CD8+ effector, terminally differentiated, CD27-
IL-16	T cells CD4- CD8- TCRgd+
IP-10/CXCL10	T cells CD4- CD8- TCRgd-
I-TAC/CXCL11	CD4+/ CD8+ ratio
MCP-1/CCL2	NK cells
MCP-2/CCL8	Eosinophils
MCP-3/CCL7	Neutrophils
MCP-4/CCL13	CD16- Monocytes
MDC/CCL22	CD16+ Monocytes
MIF	Plasmacitoid dendritic cells
lum_CCL3_1	Basophils
MIP-3alpha/CCL20
MIP-1delta/CCL15
MIP-3beta/CCL19
MPIF-1/CCL23
SCYB16/CXCL16
TARC/CCL17
TECK/CCL25
TNF-alpha
Basic FGF
G-CSF
HGF
IL-12 (p40)
IL-18
IL-1ra
IL-2Ralpha
IL-7
IL-9
LIF
M-CSF
MIG/CXCL9
MIP-1alpha/CCL3
MIP-1beta
PDGF-BB
RANTES
SCF
SCGF-beta
SDF-1alpha+beta/CXCL12
TNF-beta
TRAIL
VEGF
bNGF
APRIL/TNFSF13
BAFF/TNFSF13B
sCD30/TNFRSF8
sCD163
Chitinase 3-like 1
gp130/sIL-6Rbeta
sIL-6Ralpha
IL-11
IL-20
IL-34
MMP-1
MMP-2
MMP-3
Osteocalcin
Osteopontin (OPN)
Pentraxin-3
sTNF-R1
sTNF-R2
TSLP
TWEAK/TNFSF12
IL-21
IL-31
IL-33

## Sheet: Ext. Table 2
Extended data Table 2. List of cytokines significantly (P < 0.05, and R > 0.4) related to time to viral clearance after adjustment for multiple testing.
Cytokine/chemokine	Correlation R	p-value (adjusted)
SCF	0.4963276	0.0055902
SCYB16/CXCL16	0.4771848	0.0055902
LIF	0.4259439	0.01295
IL-4	0.4210624	0.01295
HGF	0.4133235	0.01295
gp130/sIL-6Rbeta	0.410456	0.01295

## Sheet: Ext. Table 3
Extended data Table 3. List of significant correlations (R> 0,7) between the maximum level of all immune parameters with each other (all patients).
Variable 1	Variable 2	Correlation	P-value (unadjusted)	P-value (adjusted for multiple testing)	Var 1 and 2 from different subcompartments (cellular, humoral, soluble)
SARS-CoV-2 CD8+ (%)	BAFF/TNFSF13B	0.809216	1.687e-06	2.72928e-05	1
SARS-CoV-2 CD8+ (%)	IL-7	0.793449	3.733e-06	4.72168e-05	1
Neutralization titer	MMP-1	0.714476	0.00409	0.00831142	1
T cells	Lymphocytes	0.990354	<0.01	<0.01
TARC/CCL17	RANTES	0.988802	<0.01	<0.01
TARC/CCL17	I-309/CCL1	0.979164	<0.01	<0.01
MIP-3beta/CCL19	MCP-3/CCL7	0.977271	<0.01	<0.01
I-309/CCL1	RANTES	0.972279	<0.01	<0.01
G-CSF	MIP-1alpha/CCL3	0.972069	<0.01	<0.01
IL-9	TNF-beta	0.964262	<0.01	<0.01
T cells CD8+	T cells	0.938716	4.568e-13	1.19168e-10
B cells	Pre-germinal center B cells	0.933033	1.342e-12	3.11195e-10
T cells CD8+	Lymphocytes	0.914634	2.52e-11	4.04557e-09
Memory B cells, switched	Post-germinal center B cells	0.90964	4.989e-11	7.43717e-09
MCP-4/CCL13	MDC/CCL22	0.90457	2.951e-12	6.15874e-10
HGF	IL-12 (p40)	0.902892	3.758e-12	7.12995e-10
T cells CD8+	T cells CD8+ central/transitional memory	0.900078	1.664e-10	1.93975e-08
T cells CD4+	Lymphocytes	0.892554	3.953e-10	4.12496e-08
Osteopontin (OPN)	sTNF-R1	0.890905	1.877e-11	3.26442e-09
T cells CD4+	T cells CD4+ central/transitional memory	0.877371	1.895e-09	1.46476e-07
IL-9	MIP-1beta	0.874721	1.252e-10	1.63308e-08
MIP-1beta	TNF-beta	0.872038	1.673e-10	1.93975e-08
T cells CD4+ central/transitional memory	Lymphocytes	0.869919	3.798e-09	2.61818e-07
IL-12 (p40)	LIF	0.867742	2.623e-10	2.88116e-08
T cells CD4+	T cells	0.867571	4.688e-09	2.83236e-07
HGF	LIF	0.862546	4.43e-10	4.40258e-08
MPIF-1/CCL23	IL-6	0.859054	6.225e-10	5.90526e-08
APRIL/TNFSF13	SCF	0.858443	6.601e-10	5.98969e-08
IL-20	sTNF-R1	0.851832	1.224e-09	1.04016e-07
IL-20	Osteopontin (OPN)	0.851634	1.246e-09	1.04016e-07
SARS-CoV-2 CD8+ (%)	T cells CD8+ central/transitional memory	0.851319	3.799e-06	4.75194e-05
IL-6	sTNF-R2	0.850432	1.389e-09	1.11494e-07
T cells CD8+ effector memory	T cells CD8+ effector, terminally diff., CD27-	0.848375	2.283e-08	1.01375e-06
T cells CD4+ central/transitional memory	T cells	0.847809	2.384e-08	1.03654e-06
Anti-N (C-terminal) IgG	Anti-N (N-terminal) IgG	0.84705	7.378e-11	1.02653e-08
IL-11	gp130/sIL-6Rbeta	0.846428	1.983e-09	1.47804e-07
IL-9	TRAIL	0.843942	2.461e-09	1.77107e-07
T cells CD8+	T cells CD8+ effector memory	0.840326	4.162e-08	1.63889e-06
APRIL/TNFSF13	Osteopontin (OPN)	0.838533	3.889e-09	2.61818e-07
APRIL/TNFSF13	IL-11	0.837923	4.09e-09	2.66745e-07
sTNF-R1	sTNF-R2	0.837006	4.411e-09	2.78962e-07
TECK/CCL25	Osteopontin (OPN)	0.836103	4.75e-09	2.83236e-07
lum_CCL3_1	I-TAC/CXCL11	0.835259	5.088e-09	2.94963e-07
MIP-3alpha/CCL20	lum_CCL3_1	0.834898	5.239e-09	2.95508e-07
TECK/CCL25	IL-20	0.834346	5.478e-09	3.00858e-07
TNF-beta	TRAIL	0.829092	8.312e-09	4.38728e-07
IL-2Ralpha	MMP-2	0.828873	8.455e-09	4.38728e-07
IL-2Ralpha	IL-34	0.828626	8.619e-09	4.38728e-07
T cells CD8+ central/transitional memory	T cells	0.825338	1.172e-07	3.70601e-06
MIP-3alpha/CCL20	MCP-3/CCL7	0.820953	1.543e-08	7.66724e-07
MPIF-1/CCL23	sTNF-R2	0.82038	1.61e-08	7.81412e-07
MIP-3beta/CCL19	MIP-3alpha/CCL20	0.817757	1.952e-08	9.25869e-07
IL-16	Osteopontin (OPN)	0.817245	2.025e-08	9.3915e-07
Gro-beta/CXCL2	GCP-2/CXCL6	0.816828	2.087e-08	9.46863e-07
T cells CD8+ central/transitional memory	Basophils	0.816756	2.032e-07	5.83502e-06
T cells CD8+	Basophils	0.816688	2.041e-07	5.83502e-06
MCP-3/CCL7	ENA-78/CXCL5	0.813113	2.723e-08	1.15978e-06
LIF	Osteopontin (OPN)	0.81179	2.989e-08	1.24761e-06
APRIL/TNFSF13	sTNF-R1	0.809432	3.522e-08	1.44126e-06
MIG/CXCL9	IL-8/CXCL8	0.807881	3.919e-08	1.57288e-06
IL-16	IL-1ra	0.806074	4.433e-08	1.71327e-06
Memory B cells, unswitched	Post-germinal center B cells	0.805705	3.963e-07	9.84617e-06
IL-21	IL-6	0.803933	5.122e-08	1.94357e-06
MCP-3/CCL7	Gro-alpha/CXCL1	0.802248	5.732e-08	2.13619e-06
IL-11	sCD30/TNFRSF8	0.801534	6.009e-08	2.18775e-06
Chitinase 3-like 1	IL-11	0.801358	6.08e-08	2.18775e-06
Fractalkine/CX3CL1	gp130/sIL-6Rbeta	0.800983	6.232e-08	2.20444e-06
CD16- Monocytes	Neutrophils	0.800072	5.482e-07	1.25725e-05
IL-20	sCD163	0.800017	6.641e-08	2.30996e-06
IL-2Ralpha	sTNF-R2	0.799646	6.805e-08	2.3282e-06
SCYB16/CXCL16	IL-11	0.799064	7.068e-08	2.37918e-06
NK cells	Plasmacitoid dendritic cells	0.798889	5.86e-07	1.31503e-05
T cells CD4+	T cells CD4+ naive	0.798095	6.128e-07	1.36028e-05
APRIL/TNFSF13	IL-20	0.798048	7.551e-08	2.50142e-06
lum_CCL3_1	IL-6	0.794329	9.588e-08	3.12659e-06
Chitinase 3-like 1	sCD163	0.79183	1.123e-07	3.60569e-06
MIP-1beta	TRAIL	0.790364	1.23e-07	3.83136e-06
T cells CD8+ central/transitional memory	Lymphocytes	0.787641	1.083e-06	2.06853e-05
T cells	Basophils	0.787078	1.116e-06	2.06853e-05
lum_CCL3_1	sTNF-R2	0.784095	1.806e-07	5.54283e-06
Gro-alpha/CXCL1	ENA-78/CXCL5	0.783841	1.833e-07	5.54416e-06
IFN-gamma	IL-1ra	0.783373	1.885e-07	5.61999e-06
Pentraxin-3	sIL-6Ralpha	0.782875	1.943e-07	5.71133e-06
IL-16	IL-20	0.781245	2.141e-07	6.0382e-06
Chitinase 3-like 1	sTNF-R1	0.780258	2.269e-07	6.31387e-06
TECK/CCL25	IL-16	0.779211	2.414e-07	6.62897e-06
APRIL/TNFSF13	Chitinase 3-like 1	0.778739	2.481e-07	6.72448e-06
lum_CCL3_1	MIP-1alpha/CCL3	0.778445	2.524e-07	6.75332e-06
MIP-3beta/CCL19	Gro-alpha/CXCL1	0.775899	2.926e-07	7.72983e-06
T cells CD4+ central/transitional memory	Basophils	0.775637	2.008e-06	3.11222e-05
SCYB16/CXCL16	sCD163	0.774872	3.105e-07	8.10017e-06
MMP-2	Osteopontin (OPN)	0.77351	3.356e-07	8.64688e-06
lum_CCL3_1	G-CSF	0.773104	3.435e-07	8.74249e-06
Basophils	Eosinophils	0.77255	2.339e-06	3.46205e-05
lum_CCL3_1	IL-2Ralpha	0.772237	3.608e-07	9.07216e-06
sCD163	gp130/sIL-6Rbeta	0.76972	4.157e-07	1.02067e-05
SCYB16/CXCL16	HGF	0.769144	4.293e-07	1.03918e-05
6Ckine/CCL21	sCD163	0.768984	4.332e-07	1.03918e-05
sCD163	sTNF-R1	0.768331	4.492e-07	1.06532e-05
MIP-3alpha/CCL20	Gro-alpha/CXCL1	0.767751	4.639e-07	1.08782e-05
SCYB16/CXCL16	SCF	0.766999	4.836e-07	1.12141e-05
Basophils	Lymphocytes	0.76625	3.17e-06	4.29307e-05
T cells CD8+	T cells CD8+ effector, terminally diff., CD27+	0.765193	3.333e-06	4.40251e-05
T cells CD8+ effector memory	T cells	0.764528	3.44e-06	4.45918e-05
I-TAC/CXCL11	MIG/CXCL9	0.763824	5.754e-07	1.30528e-05
sCD30/TNFRSF8	gp130/sIL-6Rbeta	0.762472	6.192e-07	1.36028e-05
IL-2Ralpha	IL-6	0.762104	6.316e-07	1.37307e-05
T cells CD8+ effector memory	Lymphocytes	0.762006	3.871e-06	4.75222e-05
MCP-3/CCL7	MIP-1alpha/CCL3	0.761323	6.587e-07	1.41722e-05
MIP-3beta/CCL19	MIP-1alpha/CCL3	0.760526	6.875e-07	1.46364e-05
IL-34	sTNF-R2	0.760339	6.943e-07	1.46364e-05
IL-11	sTNF-R1	0.759691	7.188e-07	1.50014e-05
MCP-3/CCL7	Chitinase 3-like 1	0.759437	7.286e-07	1.50553e-05
TECK/CCL25	sTNF-R1	0.757489	8.078e-07	1.65282e-05
Pre-germinal center B cells	T cells CD8+ naive	0.757195	4.832e-06	5.60939e-05
I-TAC/CXCL11	GM-CSF	0.756419	8.545e-07	1.7314e-05
MIP-3alpha/CCL20	IL-6	0.755152	9.131e-07	1.83235e-05
MMP-2	sTNF-R1	0.754296	9.547e-07	1.89758e-05
T cells CD8+	T cells CD8+ effector, terminally diff., CD27-	0.753826	5.626e-06	6.4161e-05
MIP-3beta/CCL19	ENA-78/CXCL5	0.753791	9.8e-07	1.9216e-05
IL-11	IL-20	0.753688	9.852e-07	1.9216e-05
IL-11	Osteopontin (OPN)	0.752375	1.054e-06	2.03676e-05
6Ckine/CCL21	Osteopontin (OPN)	0.75171	1.091e-06	2.06853e-05
MMP-2	sTNF-R2	0.751458	1.105e-06	2.06853e-05
IL-6	sTNF-R1	0.751198	1.12e-06	2.06853e-05
Gro-beta/CXCL2	SCGF-beta	0.750891	1.138e-06	2.08334e-05
MIP-3alpha/CCL20	MMP-2	0.750409	1.166e-06	2.11604e-05
Gro-alpha/CXCL1	MIG/CXCL9	0.749216	1.239e-06	2.22913e-05
I-TAC/CXCL11	IL-21	0.748061	1.314e-06	2.34386e-05
APRIL/TNFSF13	SCYB16/CXCL16	0.747657	1.341e-06	2.37175e-05
IL-12 (p40)	Osteopontin (OPN)	0.747147	1.376e-06	2.4132e-05
lum_CCL3_1	MCP-3/CCL7	0.746708	1.406e-06	2.44527e-05
Osteopontin (OPN)	sCD163	0.745481	1.495e-06	2.57857e-05
Chitinase 3-like 1	gp130/sIL-6Rbeta	0.745287	1.51e-06	2.58309e-05
Chitinase 3-like 1	sCD30/TNFRSF8	0.744452	1.574e-06	2.67068e-05
I-TAC/CXCL11	IL-6	0.74386	1.621e-06	2.72825e-05
Chitinase 3-like 1	IL-4	0.743397	1.658e-06	2.72928e-05
IL-34	MMP-2	0.743313	1.665e-06	2.72928e-05
ENA-78/CXCL5	Chitinase 3-like 1	0.743172	1.677e-06	2.72928e-05
IL-16	MMP-2	0.743166	1.677e-06	2.72928e-05
Chitinase 3-like 1	TNF-alpha	0.742742	1.712e-06	2.74842e-05
T cells CD4+ central/transitional memory	T cells CD8+	0.741315	9.702e-06	9.82916e-05
APRIL/TNFSF13	IL-34	0.741143	1.852e-06	2.92971e-05
6Ckine/CCL21	SCGF-beta	0.741134	1.853e-06	2.92971e-05
SCYB16/CXCL16	sTNF-R1	0.739467	2.01e-06	3.11222e-05
Basic FGF	Osteopontin (OPN)	0.739248	2.031e-06	3.11222e-05
MCP-4/CCL13	Gro-beta/CXCL2	0.739147	2.041e-06	3.11222e-05
Osteopontin (OPN)	TWEAK/TNFSF12	0.739127	2.043e-06	3.11222e-05
MPIF-1/CCL23	I-TAC/CXCL11	0.738247	2.132e-06	3.22426e-05
IL-6	MMP-2	0.736939	2.271e-06	3.40977e-05
Fractalkine/CX3CL1	sCD163	0.736499	2.319e-06	3.45697e-05
Chitinase 3-like 1	MMP-2	0.734782	2.517e-06	3.69928e-05
sCD163	sCD30/TNFRSF8	0.733036	2.734e-06	3.99011e-05
SCYB16/CXCL16	Osteopontin (OPN)	0.732632	2.786e-06	4.03777e-05
MIP-3alpha/CCL20	sTNF-R2	0.732254	2.836e-06	4.07108e-05
MPIF-1/CCL23	lum_CCL3_1	0.732165	2.848e-06	4.07108e-05
Gro-alpha/CXCL1	IL-8/CXCL8	0.731418	2.95e-06	4.1882e-05
I-TAC/CXCL11	IL-8/CXCL8	0.731024	3.005e-06	4.23746e-05
6Ckine/CCL21	SCYB16/CXCL16	0.730744	3.044e-06	4.23853e-05
IL-34	IL-6	0.730677	3.054e-06	4.23853e-05
IL-20	sTNF-R2	0.730576	3.068e-06	4.23853e-05
Basic FGF	LIF	0.730446	3.087e-06	4.23853e-05
I-TAC/CXCL11	sTNF-R2	0.73002	3.149e-06	4.29307e-05
M-CSF	SCF	0.729687	3.198e-06	4.29307e-05
SCYB16/CXCL16	gp130/sIL-6Rbeta	0.72961	3.209e-06	4.29307e-05
lum_CCL3_1	IL-21	0.729227	3.267e-06	4.34282e-05
sCD30/TNFRSF8	sTNF-R1	0.72842	3.392e-06	4.42705e-05
IL-11	sCD163	0.728403	3.394e-06	4.42705e-05
APRIL/TNFSF13	sCD163	0.727836	3.484e-06	4.48834e-05
I-TAC/CXCL11	IL-2Ralpha	0.726922	3.634e-06	4.65286e-05
BAFF/TNFSF13B	IL-7	0.726404	3.721e-06	4.72168e-05
SCF	sTNF-R1	0.725788	3.828e-06	4.75194e-05
IL-11	SCF	0.725716	3.84e-06	4.75194e-05
APRIL/TNFSF13	TECK/CCL25	0.725675	3.848e-06	4.75194e-05
6Ckine/CCL21	IL-8/CXCL8	0.72515	3.941e-06	4.80986e-05
SCGF-beta	TNF-beta	0.72447	4.065e-06	4.93236e-05
Chitinase 3-like 1	Osteopontin (OPN)	0.724082	4.137e-06	4.9907e-05
MIP-3alpha/CCL20	MIG/CXCL9	0.723776	4.195e-06	5.03159e-05
BAFF/TNFSF13B	MIP-1delta/CCL15	0.723579	4.232e-06	5.04696e-05
SDF-1alpha+beta/CXCL12	M-CSF	0.722439	4.456e-06	5.2839e-05
IL-16	sTNF-R1	0.721308	4.688e-06	5.5276e-05
Osteopontin (OPN)	sIL-6Ralpha	0.720686	4.821e-06	5.60939e-05
MCP-4/CCL13	SCGF-beta	0.720604	4.838e-06	5.60939e-05
Osteopontin (OPN)	SCF	0.718581	5.294e-06	6.10419e-05
Chitinase 3-like 1	Basic FGF	0.717843	5.47e-06	6.27247e-05
MIP-3alpha/CCL20	IL-8/CXCL8	0.717008	5.675e-06	6.43681e-05
MDC/CCL22	Gro-alpha/CXCL1	0.716496	5.805e-06	6.54867e-05
Basic FGF	IL-12 (p40)	0.716331	5.847e-06	6.56059e-05
T cells CD4+	T cells CD8+	0.715656	2.711e-05	0.000211114
MIG/CXCL9	GM-CSF	0.715264	6.127e-06	6.83799e-05
T cells CD8+ effector memory	Basophils	0.715158	2.763e-05	0.00021357
IL-20	SCF	0.713423	6.638e-06	7.36889e-05
Gro-alpha/CXCL1	GM-CSF	0.712195	7e-06	7.71421e-05
lum_CCL3_1	MMP-2	0.712119	7.023e-06	7.71421e-05
Eotaxin/CCL11	Eotaxin-3/CCL26	0.711951	7.074e-06	7.72955e-05
MCP-3/CCL7	MMP-2	0.711114	7.334e-06	7.97191e-05
MIP-3alpha/CCL20	MIP-1alpha/CCL3	0.709748	7.776e-06	8.37597e-05
MIP-3alpha/CCL20	SCYB16/CXCL16	0.709716	7.786e-06	8.37597e-05
Chitinase 3-like 1	sTNF-R2	0.708859	8.076e-06	8.64339e-05
IL-1ra	sCD30/TNFRSF8	0.708626	8.157e-06	8.68554e-05
BAFF/TNFSF13B	M-CSF	0.708337	8.258e-06	8.74845e-05
T cells CD4- CD8- TCRgd+	MMP-1	0.707983	7.519e-05	0.000463179
MIP-3beta/CCL19	Chitinase 3-like 1	0.707939	8.398e-06	8.85183e-05
Neutrophils	IL-16	0.70779	7.568e-05	0.000463179
TECK/CCL25	IL-2Ralpha	0.707753	8.465e-06	8.85931e-05
TWEAK/TNFSF12	sIL-6Ralpha	0.707683	8.49e-06	8.85931e-05
HGF	Osteopontin (OPN)	0.706886	8.781e-06	9.08465e-05
Eotaxin-3/CCL26	IL-7	0.706852	8.793e-06	9.08465e-05
IL-16	sTNF-R2	0.706659	8.865e-06	9.11392e-05
6Ckine/CCL21	MCP-3/CCL7	0.705199	9.427e-06	9.64419e-05
MIP-3beta/CCL19	G-CSF	0.704983	9.513e-06	9.6847e-05
T cells CD8+ effector, terminally diff., CD27+	Lymphocytes	0.704932	4.034e-05	0.000292325
T cells CD8+ effector, terminally diff., CD27+	T cells	0.704407	4.112e-05	0.000294905
Neutralization titer	T cells CD4- CD8- TCRgd+	0.70425	0.007205	0.0126466
LIF	MMP-2	0.703797	9.996e-06	0.000100781
Eotaxin/CCL11	MCP-3/CCL7	0.703597	1.008e-05	0.000101139
Gro-alpha/CXCL1	MMP-2	0.703083	1.03e-05	0.000102852
MCP-4/CCL13	GCP-2/CXCL6	0.702239	1.066e-05	0.00010594
IL-33	bNGF	0.700895	1.127e-05	0.000111044
SCYB16/CXCL16	Chitinase 3-like 1	0.700888	1.128e-05	0.000111044
B cells	Memory B cells, unswitched	0.700752	4.689e-05	0.000325114

## Sheet: Ext. Table 4
Extended data Table 4. List of differences between the correlations of the max. level of the immune parameters of the groups viral clearance <=21 days and >21 days.
A selection is made for differences between R values of the clearance groups of >0.5, and with significant P-values for both variables.
Variable 1	Variable 2	Difference in R between clearance groups	Correlation R viral clearance <= 21 days	P-value Clearance <=21 days (unadjusted)	P-value Clearance <=21 days (adjusted)	Correlation R viral clearance > 21 days	P-value Delayed clearance (unadjusted)	P-value Delayed clearance (adjusted)
Neutralization titer	Eotaxin/CCL11	0.8407993	-0.966166	0.001698	0.00405061135371179	0.7154326	0.04601	0.0475814990512334
SARS-CoV-2 CD8+ (%)	Plasmablasts	0.7540846	-0.6695687	0.04852	0.0490601113172542	0.8386005	0.002432	0.00838886075949367
T cells CD4+ naive	MIF	0.66126985	-0.5534827	0.03232	0.0363183505154639	0.769057	0.009317	0.0181998745519713
T cells CD4+	IL-9	0.63773265	-0.5946819	0.01938	0.0239503401360544	0.6807834	0.03024	0.0380870669745958
T cells CD4+	TNF-beta	0.6155412	-0.5926501	0.0199	0.0244268018018018	0.6384323	0.04696	0.0480172607879925
T cells CD4+ effector, terminally differentiated	CTACK/CCL27	0.59828035	-0.5170328	0.04842	0.04905	0.6795279	0.03066	0.0384131034482759
Memory B cells, unswitched	MIP-1delta/CCL15	0.5925388	-0.5315339	0.04143	0.0437584302325581	0.6535437	0.04042	0.0444131048387097

## Sheet: Ext. Table 5
Extended data Table 5. Daily severity score parameters.
* For non-ICU patients, score 0 was rated as p/f ratio2
Variable	Daily severity score (0-17)
Respiratory rate (breaths/min)
<20	0
20-29	1
≥30	2
Invasive ventilation	3
Peripheral oxygen saturation on room air (%)1
<92	2
≥92	0
p/f ratio2 *
<100 mmHg / <13.3 kPa	3
100-199 mmHg / 13.3-26.6 kPa	2
200-299 mmHg / 26.6-39.9 kPa	1
≥300 mmHg / ≥39.9 kPa	0
Oxygen flow (l/min)1
0–0.99	0
1–2.99	1
3–5.99	2
6–8.99	3
≥9	4
FiO2 (%)2
<30	0
30-44.99	1
45-59.99	2
60-79.99	3
≥80	4
Glasgow coma scale score
<15	2
15	0
Urea (mmol/L)
≤7	0
7-14	1
>14	3
C reactive protein (md/dL)
<50	0
50-99	1
≥100	2
Overall daily severity score	Sum of all scores above

## Sheet: Ext. Table 6
Extended data Table 6. List of reagents used for the identification of B and T cell subsets; NA – not applicable
Reagent	Fluorochrome	Company	Catalog	Clone
PIDOT	NA	Cytognos	CYT-PIDOT	NA
PIDOT-IgD	FITC	-	-	IADB6
PIDOT-CD8	FITC	-	-	UCHT-4
PIDOT-CD16	PE	-	-	3G8
PIDOT-CD56	PE	-	-	C5.9
PIDOT-CD4	PerCPCy5.5	-	-	RPA-T4
PIDOT-IgM	PerCPCy5.5	-	-	MHM-88
PIDOT-CD19	PE-Cy7	-	-	SA287
PIDOT-TCRγδ	Pe-Cy7	-	-	11F2
PIDOT-CD3	APC	-	-	UCHT-1
PIDOT-CD45	APC-C750	-	-	HI30
CD27	BV421	BD Biosciences	562513	M-T271
CD45RA	BV510	BD Biosciences	563031	HI100
CD38	BV605	BioLegend	303532	HIT-2
CD38	unconjugated	BioLegend	303502	HIT-2
